# Supplementary material for: Surface modified multifunctional ZnFe2O4nanoparticles for hydrophobic and hydrophilic anti-cancer drug molecule loading
Source: Royal Society of Chemistry journal article supplement (doi:10.1039/c5cp05840f), 2015-10-19
Supplement: c5cp05840f1.pdf [file c5cp05840f1.pdf]

## Surface Modified Multifunctional ZnFe<sub>2</sub>O<sub>4</sub> Nanoparticles for Hydrophobic and Hydrophilic Anti-Cancer Drug Molecules Loading

Debabrata Maiti, † Arindam Saha† and Parukuttyamma Sujatha Devi\*

Sensor & Actuator Division, CSIR-Central Glass and Ceramic Research Institute, Kolkata 700032, India.

† These two authors contributed equally.

\*E-mail: [psujathadevi@cgcri.res.in](mailto:psujathadevi@cgcri.res.in), [psujathadevi@gmail.com](mailto:psujathadevi@gmail.com)

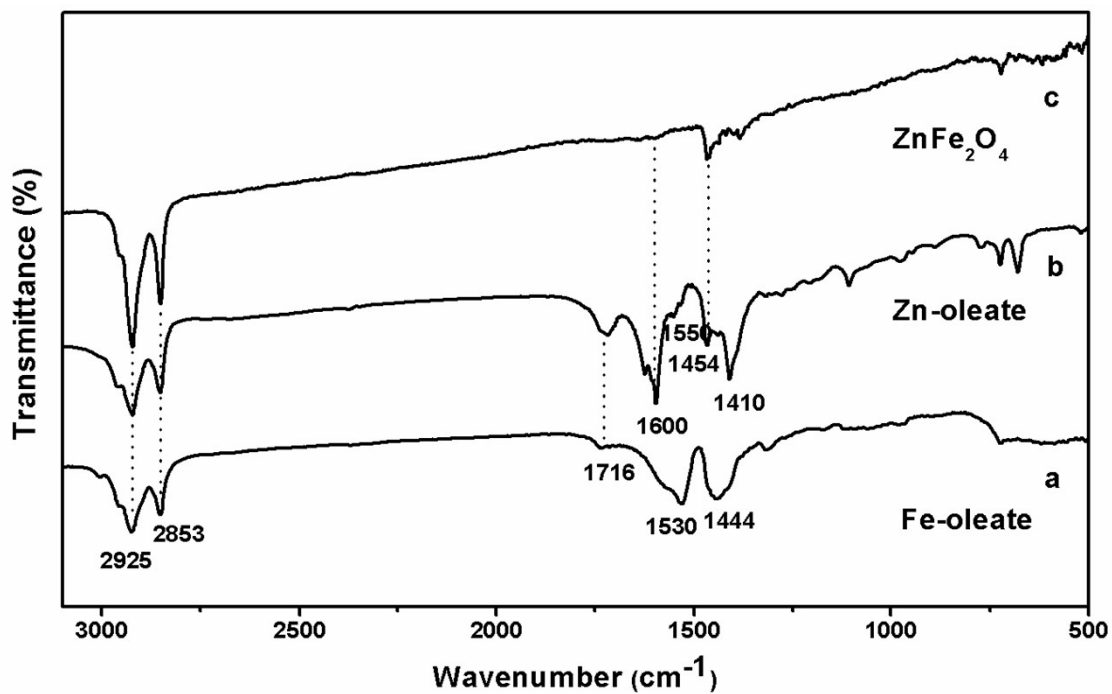

**Fig. S1:** FT-IR spectra of (a) Fe-Oleate (b) Zn-Oleate (c) as prepared  $\text{ZnFe}_2\text{O}_4$  nanoparticles

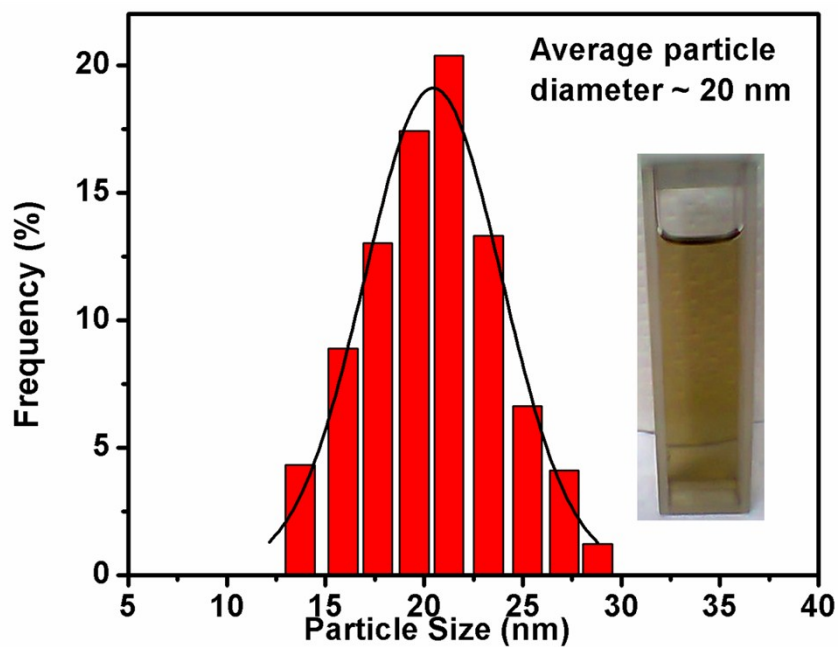

**Fig. S2:** The measured particle size distribution of (a) chloroform dispersed  $\text{ZnFe}_2\text{O}_4$  nanoparticles (inset) and the average particles size is ~20 nm.

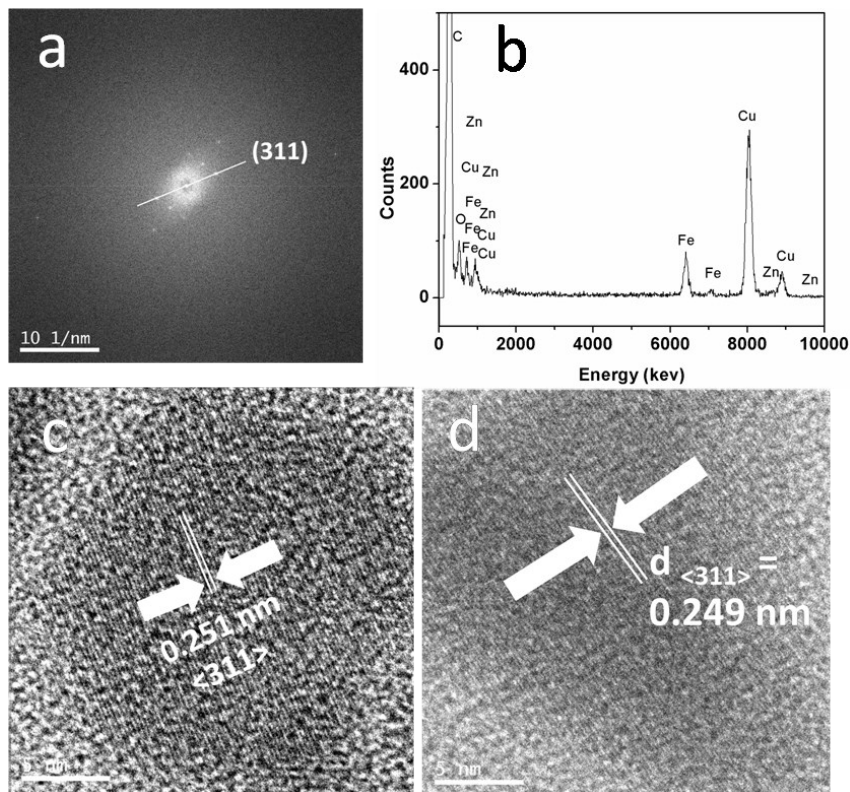

**Fig. S3:** (a) Fast Fourier transformation (FFT) pattern clearly indicates the mono crystalline nature of the particles which have 311 planes of  $\text{ZnFe}_2\text{O}_4$  (b) Energy-dispersive X-ray spectroscopy (EDS) shows the presence of Zn and Fe elements in the sample (c) and (d) are HRTEM images of  $\text{ZnFe}_2\text{O}_4$  nanoparticles.

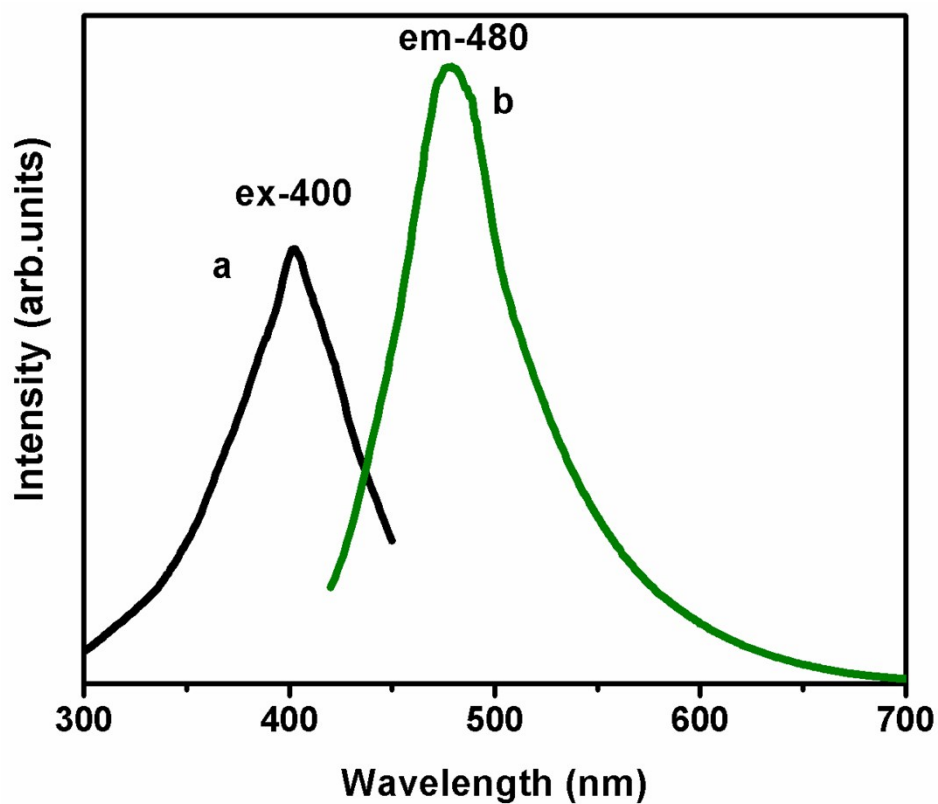

**Fig. S4:** (a) The excitation spectrum at  $\lambda_{\text{emission}}$  480 nm and (b) Emission spectrum at  $\lambda_{\text{excitation}}$  400 nm of  $\text{ZnFe}_2\text{O}_4$  nanoparticles.

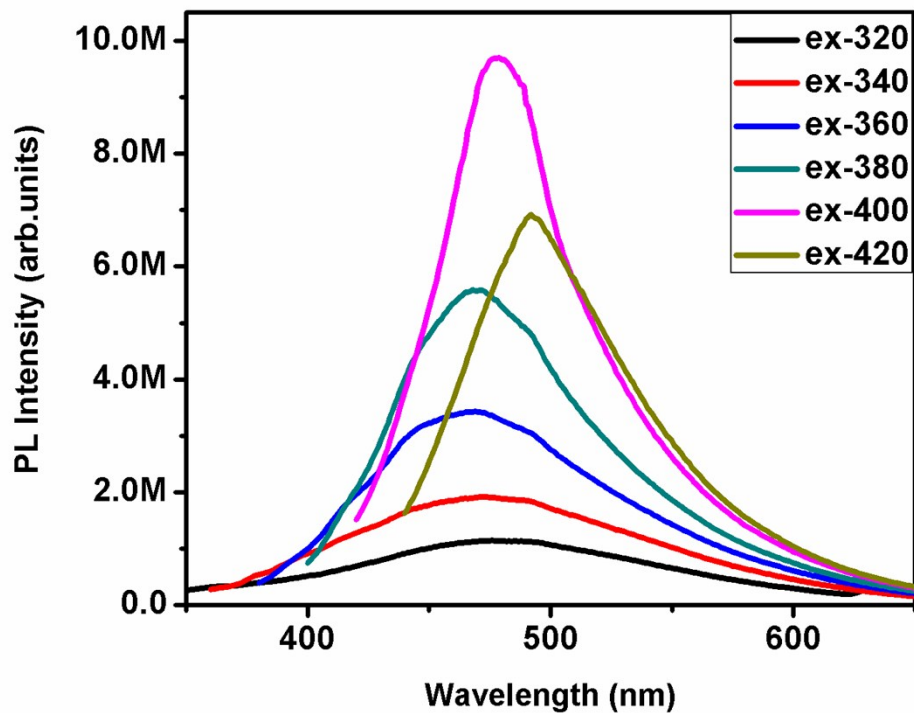

**Fig. S5:** The photoluminescence spectra of chloroform dispersed ZnFe<sub>2</sub>O<sub>4</sub> nanoparticles. The solution was excited at different excitation wavelengths,  $\lambda_{\text{excitation}}$ - 320, 340, 360, 380, 400 and 420 nm and emission peaks were centered at 470-480 nm. The highest intense peak was  $\lambda_{\text{emission}}$ -480 nm corresponding to the  $\lambda_{\text{excitation}}$ -400 nm

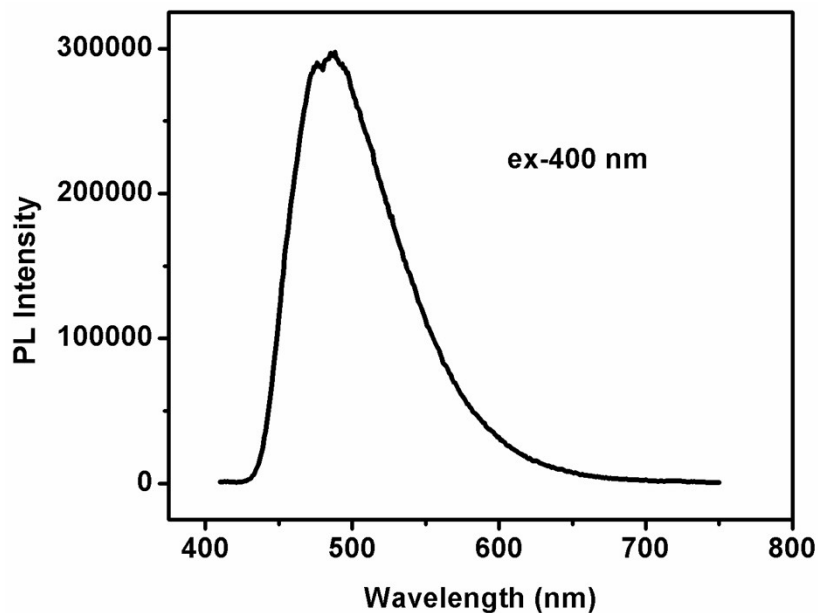

**Fig. S6:** Fluorescamine test performed to confirm the presence of primary amines groups on hydrophilic nanoparticle. For the test 200  $\mu\text{l}$  of hydrophilic  $\text{ZnFe}_2\text{O}_4$  solution and 100  $\mu\text{l}$  of carbonate buffer solution were mixed together and fluorescamine was added the solution. The emission of the solution was carried upon excitation wavelength of 400 nm.

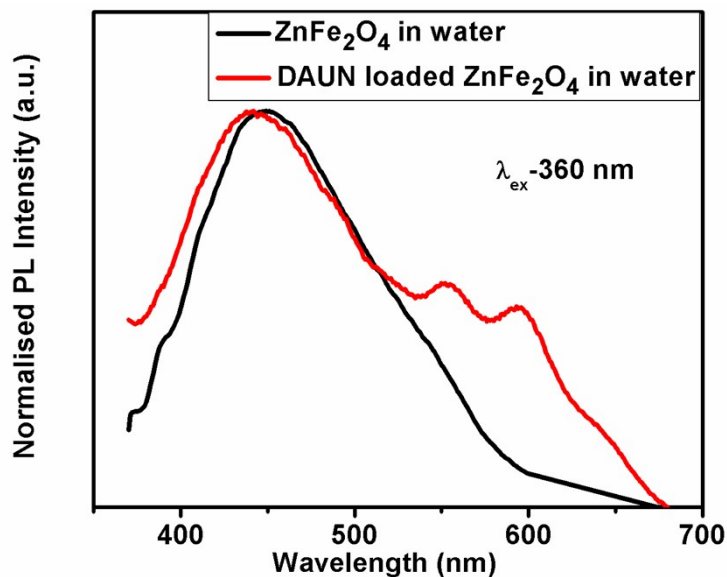

**Fig. S7:** The photoluminescence spectra of water dispersed  $\text{ZnFe}_2\text{O}_4$  and DAUN loaded  $\text{ZnFe}_2\text{O}_4$  nanoparticles on excitation at 360 nm.

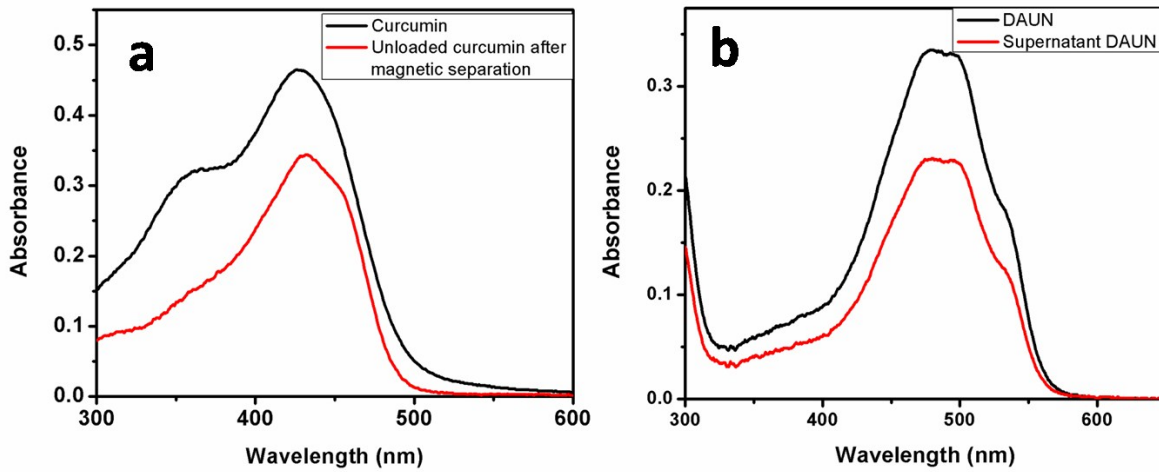

**Fig. S8:** UV-visible spectra for (a) Curcumin loading and (b) DAUN loading on  $\text{ZnFe}_2\text{O}_4$  nanoparticles

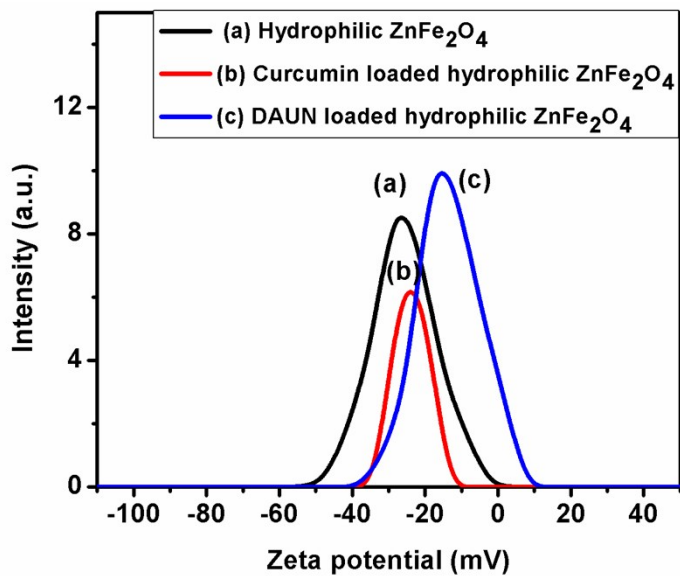

**Fig. S9:** Zeta potential measurement of hydrophilic and drug loaded  $\text{ZnFe}_2\text{O}_4$  nanoparticle

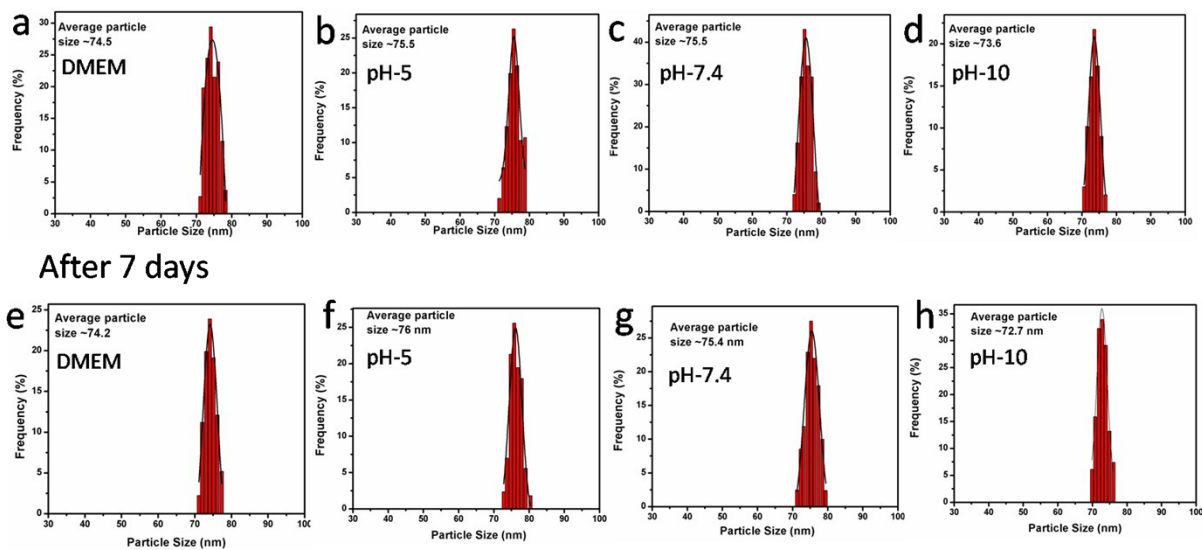

**Fig. S10:** Hydrodynamic particle size of  $\text{ZnFe}_2\text{O}_4$  nanoparticles in DMEM and different pH-buffer solutions.

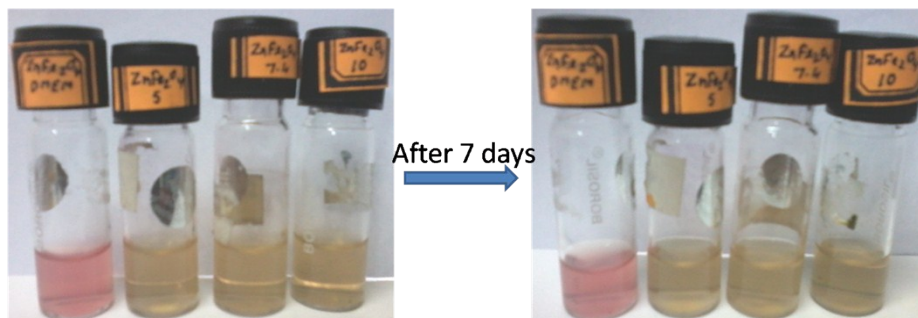

**Fig. S11:** Colloidal stability of  $\text{ZnFe}_2\text{O}_4$  nanoparticles in DMEM and different pH-buffer solutions. Digital images show optically clear solutions.



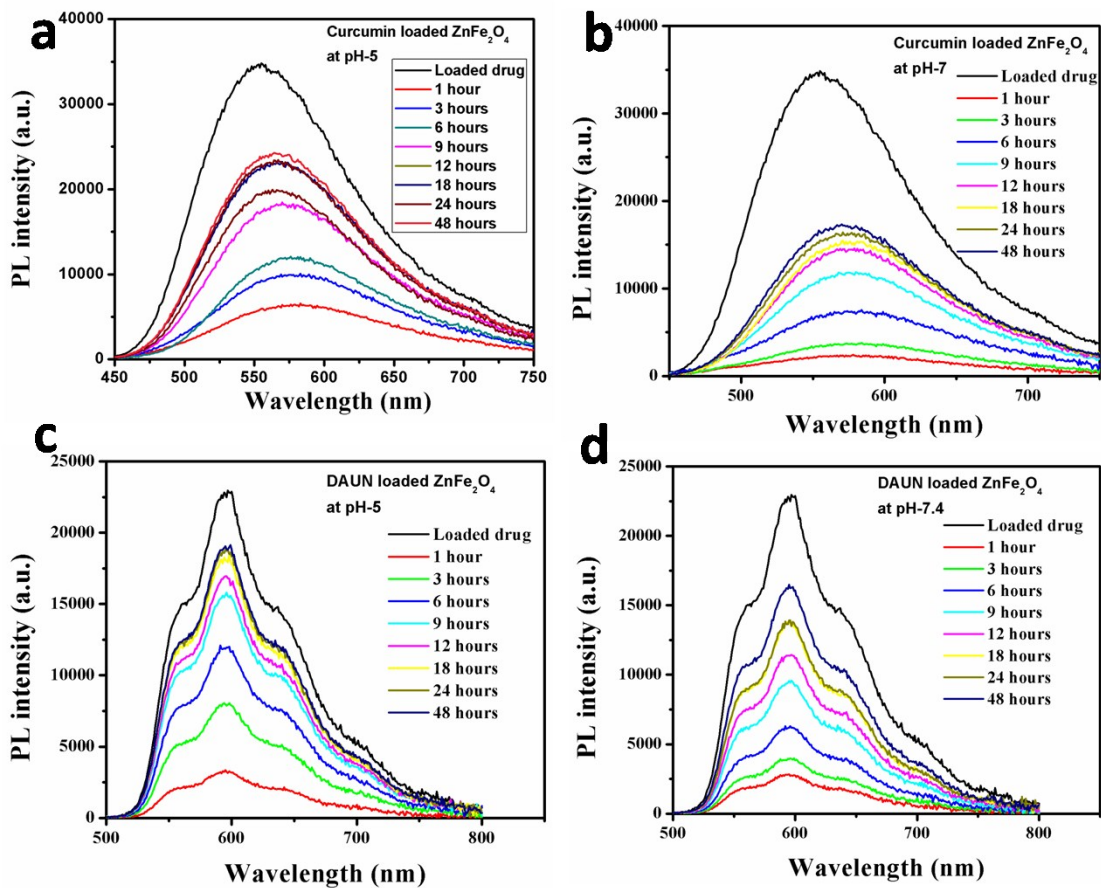

**Fig. S12:** Emission spectra depicting the drug release from curcumin loaded  $ZnFe_2O_4$  nanoparticles a) at pH ~5 b) at pH ~7.4 and DAUN loaded  $ZnFe_2O_4$  nanoparticles c) at pH ~5 and d) at pH ~7.4

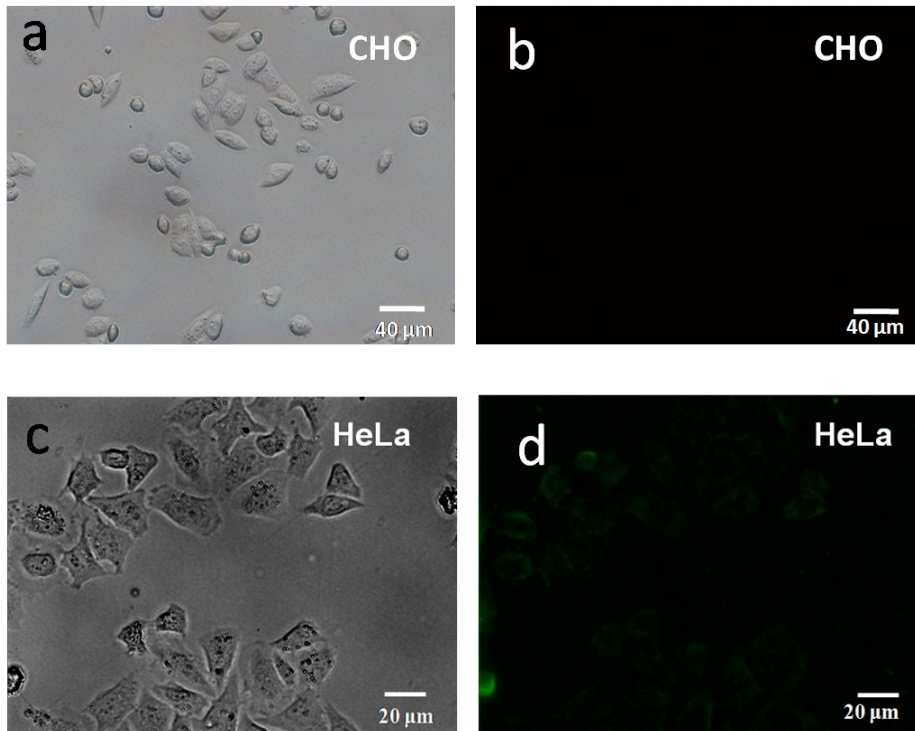

**Fig. S13** The bright field (a,c) and fluorescence (b,d) imaging of CHO and HeLa cells respectively.

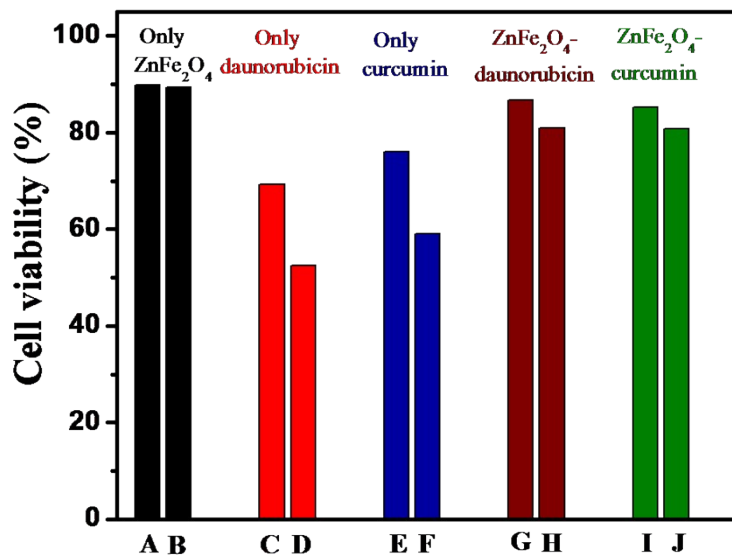

|                                       | A   | B   | C | D  | E | F  | G   | H   | I   | J   |
|---------------------------------------|-----|-----|---|----|---|----|-----|-----|-----|-----|
| <b>Particle concentration (µg/ml)</b> | 250 | 500 |   |    |   |    | 250 | 250 | 250 | 250 |
| <b>Drug concentration (µg/ml)</b>     |     |     | 5 | 10 | 5 | 10 | 0.8 | 1   | 0.8 | 1   |

**Fig. S14:** MTT assay of ZnFe<sub>2</sub>O<sub>4</sub> nanoparticles (A, B), daunorubicin (C, D) and curcumin (E, F), daunorubicin (G-J) and curcumin (K-N) loaded ZnFe<sub>2</sub>O<sub>4</sub> nanoparticles treated on normal cell line (CHO).
